# Supplementary material
Source: Springer Nature journal article supplement (https://www.springermedizin.de/resource/supplementary/12885_2010_2715_MOESM2_ESM.pdf/9461866)

*ESR1* in FNAB-array  
 $P < 0.0001$

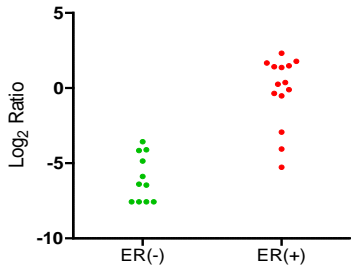

*ESR1* in FFPE-array  
 $P = 0.0005$

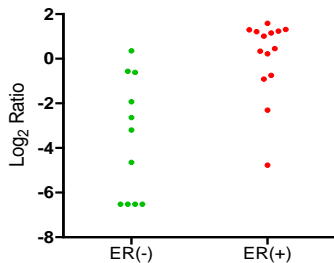

*ESR1* in FFPE-qPCR  
 $P = 0.0005$

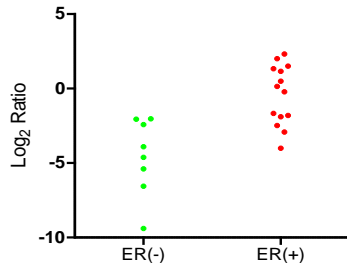

*ERBB2* in FNAB-array  
 $P < 0.0001$

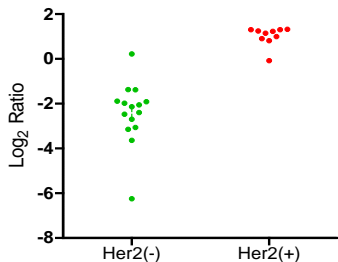

*ERBB2* in FFPE-array  
 $P = 0.0005$

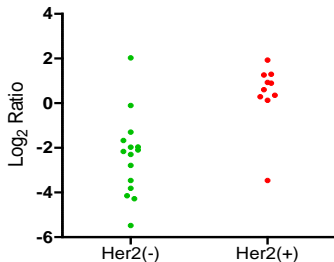

*ERBB2* in FFPE-qPCR  
 $P = 0.0002$

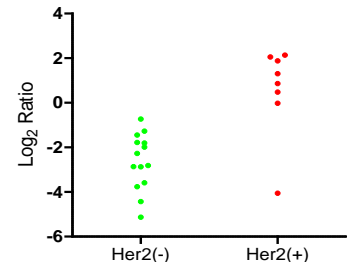

Supplement: MOESM2 [file 9461866]
